# Supplementary material for: Antibody mediated cotton-archetypal substrate for enumeration of circulating tumor cells and chemotherapy outcome in 3D tumors
Source: Royal Society of Chemistry journal article supplement (doi:10.1039/d2lc00004k), 2022-01-01
Supplement: d2lc00004k1.pdf [file d2lc00004k1.pdf]

## Antibody mediated cotton-archetypal substrate for enumeration of circulating tumor cells and chemotherapy outcome in 3D tumors

Smriti Arora,<sup>†a</sup> Alain D'Souza,<sup>†a,d</sup> Gourishankar Aland,<sup>a,d</sup> Narendra Kale,<sup>a</sup> Bhagwat Jadhav,<sup>a,d</sup> Trupti Kad,<sup>a,d</sup> Pankaj Chaturvedi,<sup>c</sup> Balram Singh,<sup>a\*</sup> Jayant Khandare<sup>a,b,d,e\*</sup>

<sup>a</sup> Actorius Innovations and Research, Pune, 411057, India

<sup>b</sup> Actorius Innovations and Research Co, Simi Valley, USA

<sup>c</sup> Department of Head and Neck Surgical Oncology, Tata Memorial Hospital, Mumbai, 400012, India

<sup>d</sup> OneCell Diagnostics, Pune, 411057, India

<sup>e</sup> OneCell Dx Inc, Cupertino, CA 95014, USA

<sup>†</sup> Authors contributed equally.

\*jayant@actorius.co.in

\*balram.rathi22@gmail.com

### Electronic Supplementary Information

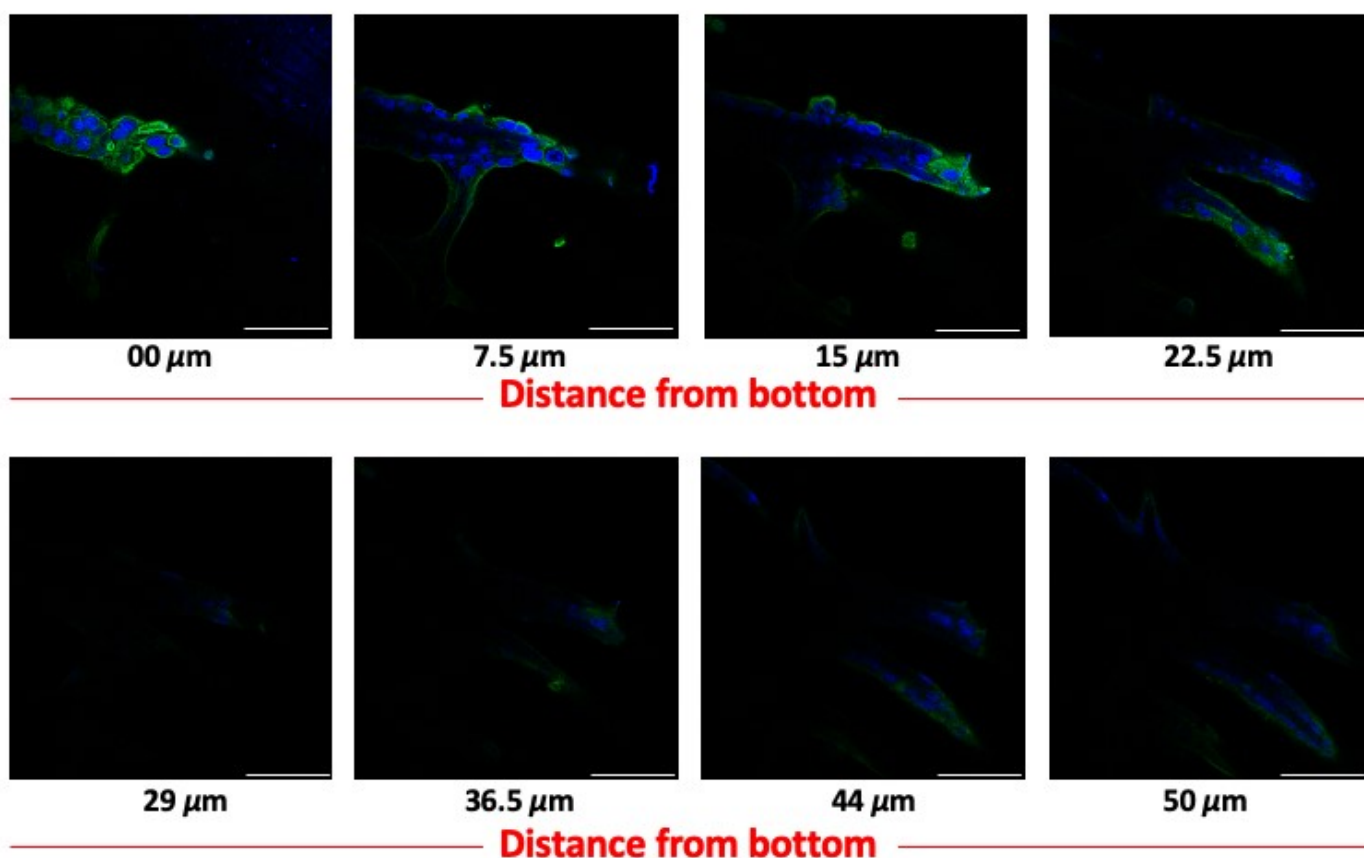

**Figure S1.** CMS<sub>1</sub> grown 3D tumor CSLM picture montage of image stacks/slices obtained in the z-stack mode. Focal planes at indicated depths from the bottom of the tumor (0-50  $\mu\text{m}$ ) were obtained along the z-axis. The above images are representative images chosen from a total of 100 slices that made up the CSLM images represented in manuscript Figures 5 and 6 respectively. Scale bar depicts 100  $\mu\text{m}$ .

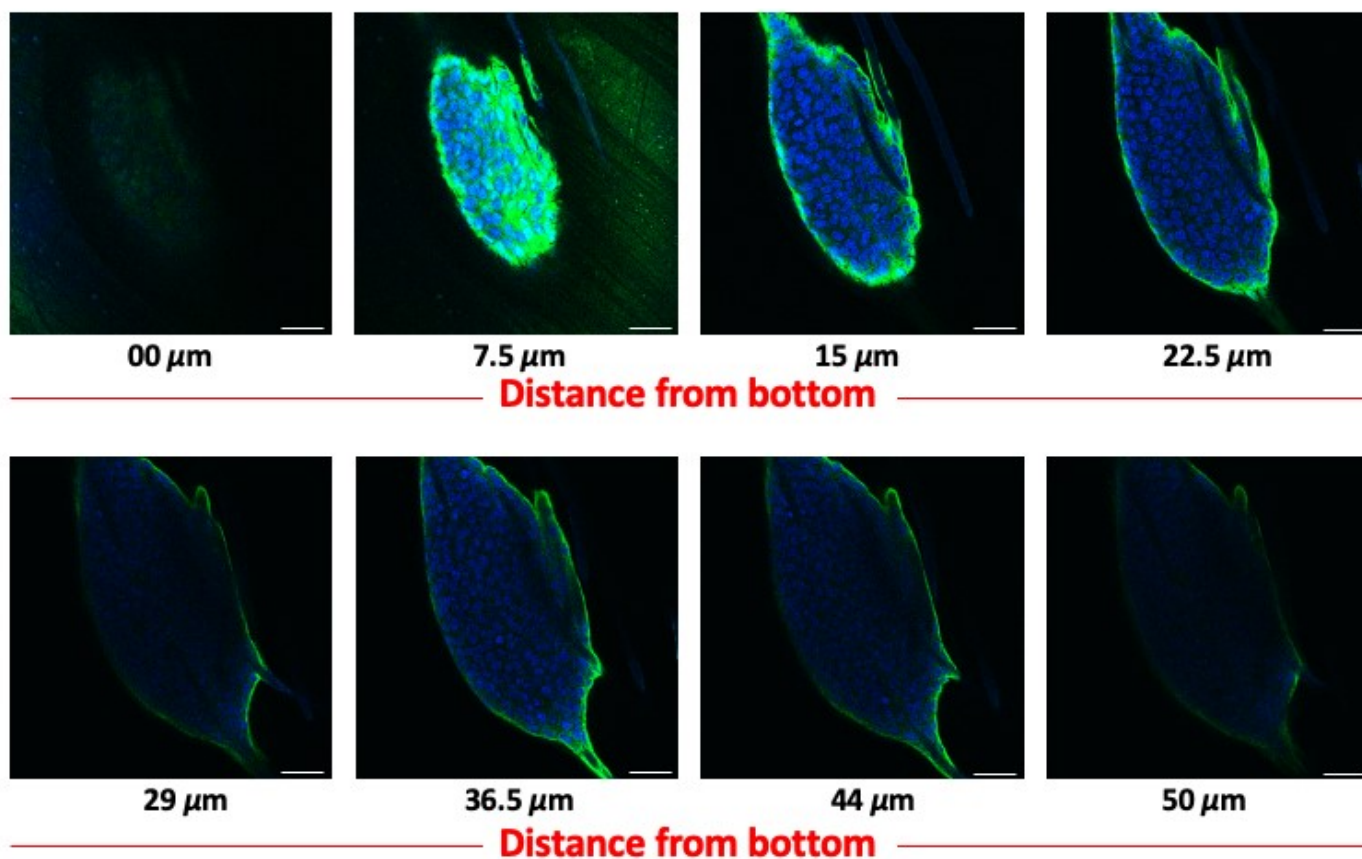

**Figure S2.** CMS<sub>2</sub> grown 3D spheroid CSLM picture montage of image stacks/slices obtained in the z-stack mode. Focal planes at indicated depths from the bottom of the tumor (0-50  $\mu\text{m}$ ) were obtained along the z-axis. The above images are representative images chosen from a total of 100 slices that made up the CLSM images represented in manuscript Figures 5 and 6 respectively. Scale bar depicts 50  $\mu\text{m}$ .
